# Supplementary material for: Breeding Schemes: What Are They, How to Formalize Them, and How to Improve Them?
Source: Front Plant Sci. 2022 Jan 21;12:791859. doi: 10.3389/fpls.2021.791859 (PMC8813775; doi:10.3389/fpls.2021.791859)
Supplement: Supplementary file 1 [file Table_1.XLSX]

## Sheet: IP_OptimalCrossing
A3
Title: Finding optimal number of parents, crosses and progeny			Name(s): Kanju Edward	Date:12/05/2020
Background:			Proposed Countermeasure(s):
What is the business reason for choosing this issue? Too few parents will be impossible to maintain adequate diversity required to increase genetic gain over time			Your proposal to reach the future state, the target condition. - What alternatives could be considered? . No alternatives - How will you choose among the options? What decision criteria? .
Current Conditions:
Where things stand today. - What’s the problem with that, with where we stand? We currently use only four parents and only twelve crosses . - What is the actual symptom that the business feels that requires action? We have observed low heritability for quantitative traits like yield Show visually – pareto charts, graphs, drawings, maps, etc.
			Implementation Plan:
			A chart or table that shows actions/outcomes, timeline and responsibilities. SEE NEXT SHEET + RACI + Performance-Monitoring plan + Matemathical tools
Target(s)/Goal(s)
The specific outcome required for the business. - What is the specific change you want to accomplish now? Increase heritabilty and thus genetic gains by Incresing the number of parents and number of crosses - How will you measure success? When we have incresed the number of progenitors and crosses to the minimum advocated by QG theories is reflected in increased heritability and higher rates of g…
Analysis
The root cause(s) of the problem. - Why are we experiencing the symptom? 1) Very few varieties are resistant to both CMD and CBSD ; 2)Quarantine issues for importing vegatative materials ; - What constraints prevent us from the goal? 1) We need to determine the optimal number of founders and crosses to maximize genetic gain; 2) skills to implement this, . Choose the simplest problem-solving tool …
			Follow Up:
			Remaining issues that can be anticipated. - Any failure modes to watch out for? Any unintended consequences? Ensure ongoing P-D-C-A (plan-do-check-adjust). Don't stop with implementation.

## Sheet: Plan_optimal_crossing_etc
Improvement					Control
Action item	Responsible	Accountable	Consulted	Informed	KPI	Due date (mm/dd/yyyy)	Baseline (current value)	Target (target value)	Data source (how will it be measured)
Simulate the optimal number of parents, crosses and progeny per cross. to recommend the optimal evaluation strategy that allows to maximize genetic gain per dollar invested	Chris	Eduardo	Edward	Head of breeding, DDG-Research	Number of parents and crosses determined	2020-07-01	4 parents; 12 crosses	TBD	simulated data
Organize a meeting to discuss results from simulation and take a decision on how to run the program	Eduardo	Peter Kulakow	Edward, Chris, Dorcus	Head of breeding, DDG-Research	Meeting ocurring	2020-07-07	meeting has not ocurred	Meeting occurs and decision is taken	Results from simulation
Document the new procedure	Edward	Head of breeding	EiB-Roslin	Head of breeding, DDG-Research	SOP developed	2020-07-30	SOP has not been developed	SOP will be available	Simulation results and Breeder's experience
Train the technicians on the new SOP	Edward	Head of breeding	Peter Kulakow	Head of breeding, DDG-Research	Training happening	2020-08-15	Technicians not trained	Technicians trained	Simulation results and Breeder's experience
Make new crossing block using the new SOP	Technicians	Edward	Peter Kulakow	Head of breeding, DDG-Research	Crossing block using new SOP	2020-09-01	Crossing block not established	Crossing block established and technicians using the new SOP	Breeder's experience

## Sheet: Simulation treatments
Plan 1: Optimal #Parents, #Crosses, #progeny
T1	Use of current #parentes, #crosses, #progeny
T2	Different combinations of #parents, #crosses, #progeny under 1500-5000 genotype restriction

## Sheet: IP_ReducingCycleTime
A3
Title: Reducing cycle time based on QG principles			Name(s): Kanju Edward	Date:12/05/2020
Background:			Proposed Countermeasure(s):
What is the business reason for choosing this issue? By reducing the cycle time we can increase the genetic gain and the likelihood to delivery better products at faster rate increasing our impact and increasing performance.			Your proposal to reach the future state, the target condition. - What alternatives could be considered? Recycling after the first yield evaluation by trading accuracy off. Testing at earlier stages and using sparse testing to cover better the TPE. - How will you choose among the options? What decision criteria? we will go from the least to the most disruptive.
Current Conditions:
Where things stand today. - What’s the problem with that, with where we stand? We currently evaluate our genotypes in two stages of yield trials (preliminary and advanced) before we recycle individuals to ensure high accuracy of selections. - What is the actual symptom that the business feels that requires action? We have a low rate of genetic gain for yield due to long recycling times mainly due…
			Implementation Plan:
			A chart or table that shows actions/outcomes, timeline and responsibilities. SEE NEXT SHEET + RACI + Performance-Monitoring plan + Matemathical tools
Target(s)/Goal(s)
The specific outcome required for the business. - What is the specific change you want to accomplish now? Reduce the cycle time in our breeding program for example by going to multi-locational testing early. - How will you measure success? When we have decreased our recycle time to 1-3 years for population improvement and is reflected in higher rates of genetic gain for the traits specified in ou…
Analysis
The root cause(s) of the problem. - Why are we experiencing the symptom? 1) low multiplication ratio; 2) long cropping cycle; - What constraints prevent us from the goal? 1) We need to determine the accuracy of selecting parents at the early testing stages; 2) the optimal set of replications and environments needed to maximize genetic gain; 3) skills to implement this, buy-in from the programs, e…
			Follow Up:
			Remaining issues that can be anticipated. - Any failure modes to watch out for? Any unintended consequences? There's risk for breeders and management to not seeing the value. Ensure ongoing P-D-C-A (plan-do-check-adjust). Don't stop with implementation.

## Sheet: Plan_Cycle Time
Improvement					Control
Action item	Responsible	Accountable	Consulted	Informed	KPI	Due date (mm/dd/yyyy)	Baseline (current value)	Target (target value)	Data source (how will it be measured)
Simulations to show the trade off in accelerated genetic gain when CET recycle is done as against at PYTstage. Show by simulation how selection of families can result in sustained genetic gain over aperiod than selectng individuals of best performance. Genetic gain to be made at TPEs identified from simulations Can we show through simulation what would be the gain in accuracy and genetic gain whe…	Chris	Dorcus	Elizabeth, Afolabi, Dr Kanju	Peter Kulakow	genetic gain from simulation available and report	2020-07-15	TBD	TBD	Simulations
Discuss the results of the simulations	Chris	Dorcus	Elizabeth, Afolabi, Dr Kanju	Peter Kulakow	Meeting ocurring	2020-07-21	meeting has not ocurred	meeting and decision taken	Results from the simulation
Discuss within the HarvestPlus team and other breeders on the scheme to pilot	Elizabeth, Afolabi, Kanju	Kulakow, Asiedu	HarvestPlus Breeders and team	DDG	Meeting ocurring	2020-07-30	meeting has not ocurred	meeting and decision taken	Results from the simulation
During COVID-19 identify strategy to deploy all rapid mutiplication schemes to raise planting materials for the trial	Elizabeth Mercy	Kulakow	Mercy	DDG	sufficent planting materials of elite selected clones multiplied for planting across TPEs	2020-09-30	20 stems each	TBD	report on available stems
Develop a protocol for the new evaluation strategy	Elizabeth Mercy	Kulakow	EiB		Protocol available
Run a trianing for the people or NARs to adopt the new SOP	Elizabeth Mercy	Kulakow	EiB		SOP available
Run the new evaluation strategy	Elizabeth Mercy	Kulakow	EiB			6/1/2020 | 6/1/2021
Present results of GG for early recycle in CBU and PAM on what the new strategy is	Elizabeth ,Afolabi Kanju	Kulakow	Robert Asiedu Kulakow	DDG	present GG for key traits assessed and shared	yet to be decided	yet to be decided	TBD	Reported advanced tria results presented at PAM
Present findings in genetic gain after three cycles during the product advancement meeting and conclude on following the tested scheme	Elizabeth ,Afolabi Kanju	Head of Breeding	Robert Asiedu, Kulakow	DDG	Heritability Accuracy and Genetic Gain	yet to be decided	yet to be decided	TBD	Reported advanced tria results presented at PAM

## Sheet: SimulationTreatments
Plan 2:	Evaluation/cycle time
Given that we already know that a mixed crossing block from PYT and AYT is the best, can we delay these till the software is ready to test the diffrence btn 1*4 and 4*1 (locs*reps)
	Under better TPE sampling at early stages
T1	Recycling at PYT with 4*1 or 1*4 (locs*rep)
T2	Recycling at AYT with 6*1 or 2*3 (locs*rep)
T3	Recycling at UYT-1 with 6*1 or 2*3 (locs * rep)
T4	Recycling at UYT-2 with 9*1 or 3*3 (locs * rep)
Summary from results in IP1
nParents 16-32
nCrosses 100-200
nProgeny 10-15
Using 19 parents
